# Supplementary material for: Insights into Fe-doping effect-induced heterostructure formation for the oxygen evolution reaction
Source: Royal Society of Chemistry journal article supplement (doi:10.1039/d3cc03485b), 2023-01-01
Supplement: d3cc03485b1.pdf [file d3cc03485b1.pdf]

## Supplementary Information

Insights into Fe-doping effect induced heterostructure formation for oxygen evolution reaction

Xingyu Huang<sup>a</sup>, Lice Yu<sup>a</sup>, Xinzhong Wang<sup>b</sup>, Ligang Feng<sup>\*a</sup>

<sup>a</sup> School of Chemistry and Chemical Engineering, Yangzhou University, Yangzhou 225002, P.R. China.

<sup>b</sup> Information Technology Research Institute, Shenzhen Institute of Information Technology, Shenzhen, China

Email: ligang.feng@yzu.edu.cn; fenglg11@gmail.com

## Experimental Sections

### Chemicals

All chemicals were purchased and used without any additional purification.  $\text{Ni}(\text{NO}_3)_2 \cdot 6\text{H}_2\text{O}$ ,  $\text{FeCl}_3 \cdot 6\text{H}_2\text{O}$ ,  $\text{NH}_4\text{F}$ ,  $\text{CO}(\text{NH}_2)_2$ ,  $\text{CH}_3\text{CH}_2\text{OH}$  and  $\text{C}_2\text{H}_6\text{O}_2$  were bought from Shanghai Aladdin Bio-Chem Technology Co., LTD. KOH was purchased from Sinopharm Chemical Reagent Co., Ltd. All solutions were prepared with ultrapure water (Thermo Fisher Scientific (USA) Co., Ltd). Besides,  $\text{IrO}_2$  (99.9%) powders were bought from Shanghai Macklin Biochemical Technology Co., Ltd.

### Synthesis of Fe-doped $\text{Ni}(\text{OH})_2$ precursor

$\text{Ni}(\text{NO}_3)_2 \cdot 6\text{H}_2\text{O}$  (2 mmol),  $\text{FeCl}_3 \cdot 6\text{H}_2\text{O}$  (0.1 mmol, 0.2 mmol, 0.3 mmol),  $\text{NH}_4\text{F}$  (10 mmol), and hexamethylenetetramine (HMTA) (1.2 mmol) were dissolved in distilled water (80 mL) with continuous stirring. The obtained solution was transferred into a 200 mL autoclave reactor and maintained at 120 °C for 9 h. After being washed with deionized water and absolute ethanol, and dried at 60 °C for 6 h, the Fe-doped  $\text{Ni}(\text{OH})_2$  was obtained.

### Synthesis of Fe-doped NiS with different Fe doping quantity

Then, the Fe- $\text{Ni}(\text{OH})_2$  precursor 30 mg and amidinothiourea 160 mg were put into a porcelain boat. The sulfur powder was placed at the upstream side and the heating rate was 3 °C  $\text{min}^{-1}$ . After heating at 300 °C and maintaining for 1 h in the high-purity nitrogen atmosphere. The molar ratio of Fe to Ni in the precursor of 5%, 10%, and 15% were employed to prepare the final catalyst of Fe-NiS-1, Fe-NiS-2, and Fe-NiS-3, respectively,

### Synthesis of pure NiS

The pure NiS was obtained following the same procedure without adding  $\text{FeCl}_3 \cdot 6\text{H}_2\text{O}$ .

### Characterization

The sample was characterized on Bruker D8 advance X-ray diffraction (XRD) with Cu  $K\alpha$  radiation source operating at 40 kV and 40 mA at a scanning rate of 5°  $\text{min}^{-1}$ . The morphology is examined with an FEI Sirion-200 scanning electron microscope (SEM) and transmission electron microscopy (TEM, Philips, TECNAI 12, Holland). High-resolution TEM and energy-dispersive X-ray spectroscopy (EDS) mapping images were taken under a scanning TEM modal. X-ray

photoelectron spectroscopy (XPS) measurement was carried out on an ECSALAB250Xi spectrometer with an Al  $K_{\alpha}$  radiation source.

## Catalytic activity test

### (1) Electrochemical measurements

All the electrochemical measurements were carried out by a conventional three-electrode system via a Bio-Logic VSP electrochemical workstation (Bio-Logic Co, France). The working electrode was prepared by coating the catalyst ink over the glassy carbon electrode (3 mm diameter, 0.07 cm<sup>2</sup>). The graphite rod and Mercury/mercury oxide electrode (Hg/HgO) were used as the counter and reference electrode, respectively. All tests were carried out at room temperature (around 25 °C). The potential reported at work was converted to the reversible hydrogen electrode, according to the formula:  $E(\text{RHE}) = E(\text{Hg/HgO}) + 0.0591 \cdot \text{pH} + 0.098 \text{ V}$ .

The catalyst ink was prepared as follows: The as-obtained catalysts (5 mg) were uniformly dispersed in the mixed solution of 950  $\mu\text{L}$  absolute ethyl alcohol and 50  $\mu\text{L}$  Nafion solution (5 wt.%) through the sonication for 1 h. Then 10  $\mu\text{L}$  of the catalyst ink was pipetted and dropped onto a pre-cleaned glassy carbon and naturally dried. The catalyst loading for the whole catalyst was 0.40 mg cm<sup>-2</sup>. The glassy carbon electrode was polished, thoroughly cleaned with an alumina slurry of 50 nm, and finally dried at room temperature before use. For OER tests, the linear sweep voltammograms (LSV) and cyclic voltammograms (CV) were measured at a scan rate of 5 mV s<sup>-1</sup> in 1 M KOH solution. The 1M KOH solution was purged by pure N<sub>2</sub> for approximately 25 min. Fe-containing electrolyte was the purity 1M KOH solution used to test Fe-NiS-2. We can observe that in the EDS there was a little amount of Fe after the OER process, which can indicate that Fe was dissolution into the KOH solution.

### (2) Tafel analysis

For the Tafel equation,  $\eta = a + b \log(j)$ , where  $\eta$  (V) is the overpotential,  $j$  (mA cm<sup>-2</sup>) is the current density, and  $b$  (mV dec<sup>-1</sup>) represented the Tafel slope.

### (3) ECSA measurement and calculation

To acquire the electrochemically active surface area (ECSA) of the working electrode, their roughness factor ( $R_f$ ) should be obtained firstly according to the equation:  $\text{ECSA} = R_f \cdot S$ , where  $S$  was generally equal to the geometric area of the electrode (in this work,  $S = 0.07 \text{ cm}^2$ ). The  $R_f$  was

determined by the relation  $R_f = C_{dl}/40$  based on the double-layer capacitance ( $C_{dl}$ ) of a smooth metal surface ( $40 \mu\text{F cm}^{-2}$ ) under the potential of 1.03-1.13 V vs. RHE in 1M KOH solution. The scan rates were 20, 40, 60, 80, 100  $\text{mV}\cdot\text{s}^{-1}$ . The  $C_{dl}$  was estimated by plotting  $j$  at 1.08 V vs. RHE (where  $j$  is the current density) against the scan rate.

#### (4) Electrochemical Impedance Measurements

The ohmic resistance used for  $iR$ -correction was obtained from electrochemical impedance spectroscopy measurements with frequencies ranging from 1000 kHz to 10 mHz with an amplitude of 5 mV.

#### (5) Stability test and Chronoamperometry measurement

The dynamical stability was tested for many cycles at the constant scan rate of 50  $\text{mV s}^{-1}$ . After 1000 and 2000 cycles, the polarization curve at 5  $\text{mV s}^{-1}$  was recorded for comparison with the initial curve. To estimate the stability of the catalysts, the chronoamperometry was also performed in 1 M KOH solution at a fixed overpotential of 275 mV for 20 h.

#### (6) Specific activity and turnover of frequency (TOF) calculation

The specific activity was obtained by normalizing the apparent current to ECSA. The TOF ( $\text{s}^{-1}$ ) for OER can be calculated with the following equation  $\text{TOF} (\text{s}^{-1}) = I / (4 * F * n)$ , Where  $I$  is the current (A) during linear sweep measurement,  $F$  is the Faraday's constant (96485.3 C/mol),  $n$  is the number of active sites (mol).

### Computational methods

The CASTEP module of the Materials Studio software (Accelrys Inc.) was employed for the quantum chemistry calculations. Perdew–Burke–Ernzerh (PBE) of approximation was selected as the generalized gradient approximation (GGA) method to calculate the exchange-correlation energy. The Broyden–Fletcher–Goldfarb–Shanno (BFGS) scheme was selected as the minimization algorithm. The energy cut-off is 440 eV and the SCF tolerance is  $1.0 \times 10^{-6}$  eV/atom. The optimization is completed when the energy, maximum force, maximum stress and maximum displacement are smaller than  $5.0 \times 10^{-6}$  eV/atom, 0.01 eV/Å, 0.02 G Pa and  $5.0 \times 10^{-4}$  Å, respectively. A vacuum slab exceeding 15 Å was employed in the z direction to avoid the interaction between two periodic units. The model size of NiS is about,  $a=9.504$  Å,  $b=9.504$  Å,  $c=6.253$  Å. Doped Fe is constructed by replacing Ni atoms in NiS model, and the model size is consistent where

the OER progress is studied on the (101) surface. K point is  $3 \times 3 \times 4$ . The model size of  $\text{NiS}_2$  is about,  $a=5.687 \text{ \AA}$ ,  $b=11.375 \text{ \AA}$ ,  $c=5.687 \text{ \AA}$ . Doped Fe is constructed by replacing Ni atoms in  $\text{NiS}_2$  model, and the model size is consistent where the OER progress is studied on the (200) surface. K point is  $4 \times 2 \times 4$ . Considering that the main active species in the OER reaction process is  $\text{NiOOH}$ , the  $\text{NiOOH/NiS}$ ,  $\text{NiOOH/Fe-NiS}$  and  $\text{NiOOH/Fe-NiS}_2$  heterojunction surfaces are constructed based on the  $\text{NiS}$ ,  $\text{Fe-NiS}$  and  $\text{Fe-NiS}_2$  models. The Gibbs free energy of the reaction can be obtained from eqn(1).<sup>1,2</sup>

$$\Delta G^* = \Delta E_{\text{ads}} + \Delta E_{\text{ZEP}} - T\Delta S \quad (1)$$

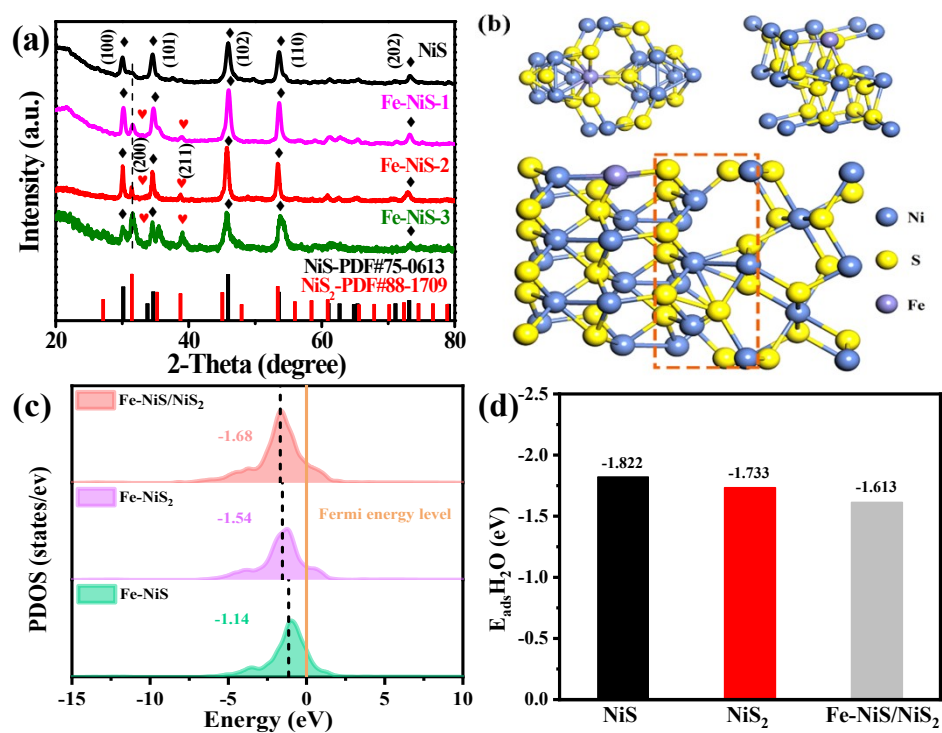

Fig.S1 (a) The X-ray diffraction patterns (XRD) of NiS and different Fe-doped NiS catalysts. (b) The model (and (c) d center of the partial density of states for Fe-doped NiS, Fe-doped NiS<sub>2</sub>, and Fe-doped NiS/NiS<sub>2</sub>. (d) The adsorption energy of water molecules for NiS, NiS<sub>2</sub> and Fe-NiS/NiS<sub>2</sub>.

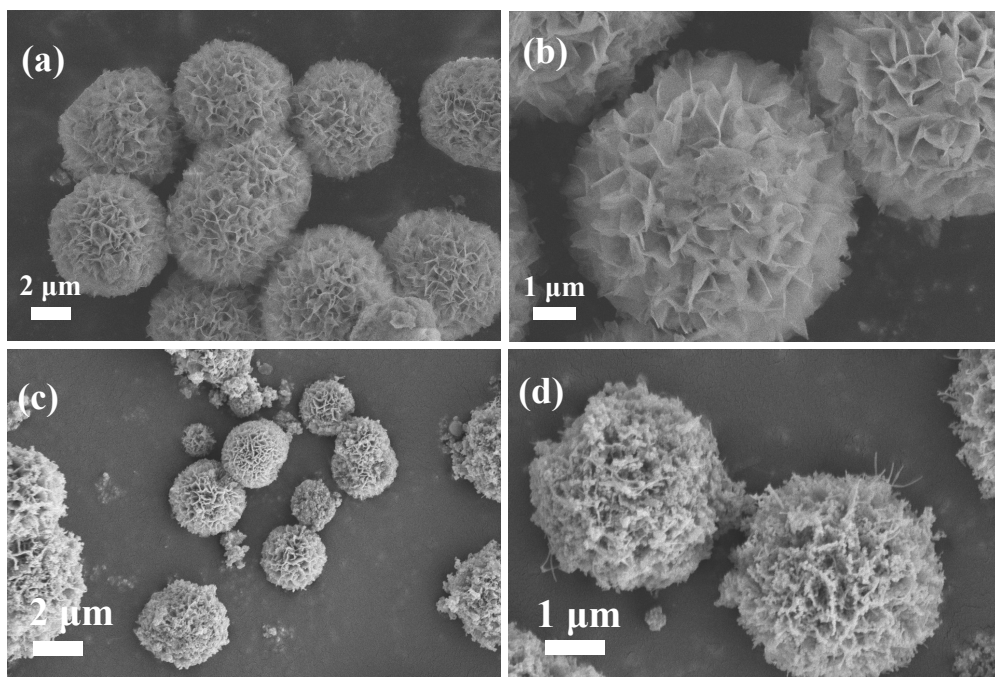

Fig. S2 Scanning electron microscopy (SEM) images of (a-b) Fe-Ni(OH)<sub>2</sub> and (c-d) Fe-NiS-2 catalysts.

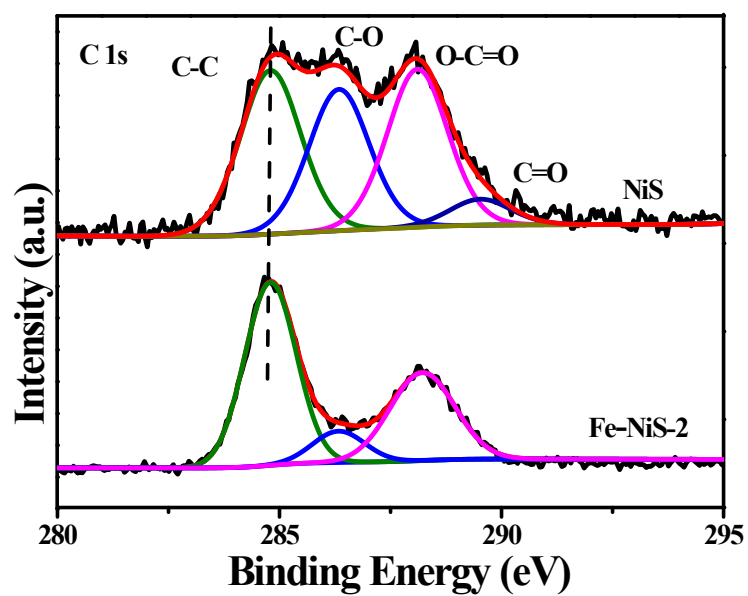

Fig. S3a High-resolution XPS spectrum of C 1s for NiS and Fe-NiS-2 catalysts.



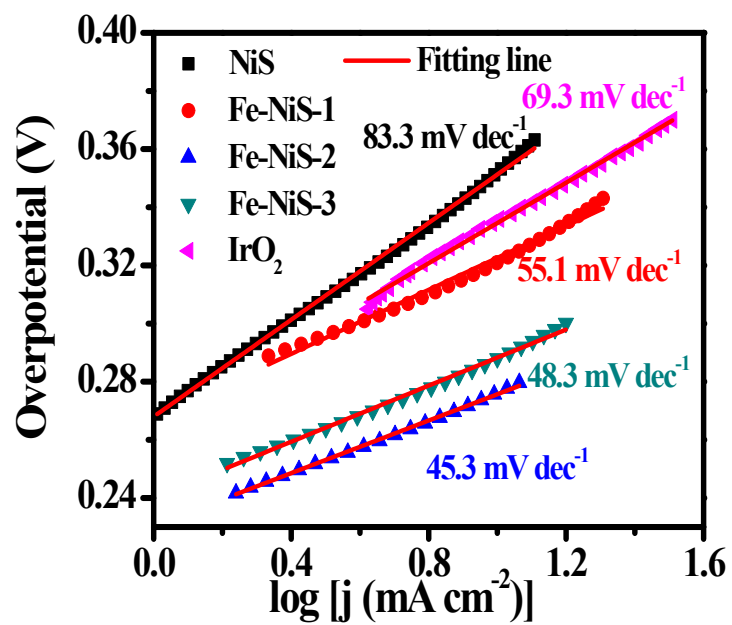

Fig. S3b Tafel slope for NiS and Fe-doped NiS catalysts.

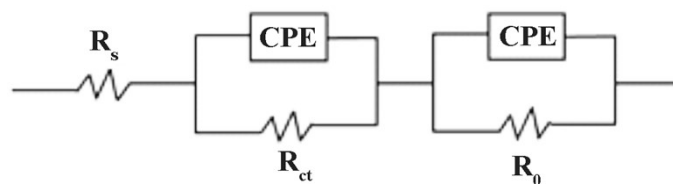

Fig. S4 The equivalent circuit model of EIS analysis.  $R_s$  means uncompensated solution resistance,  $R_{ct}$  is a charge transfer resistance,  $R_0$  is associated with the contact resistance between the catalysts, and the CPE generally was employed to fit the impedance data by safely treating it as an empirical constant without considering its physical basis. And mostly, it was regarded as the double-layer capacitor from the catalyst/support and catalyst solution.

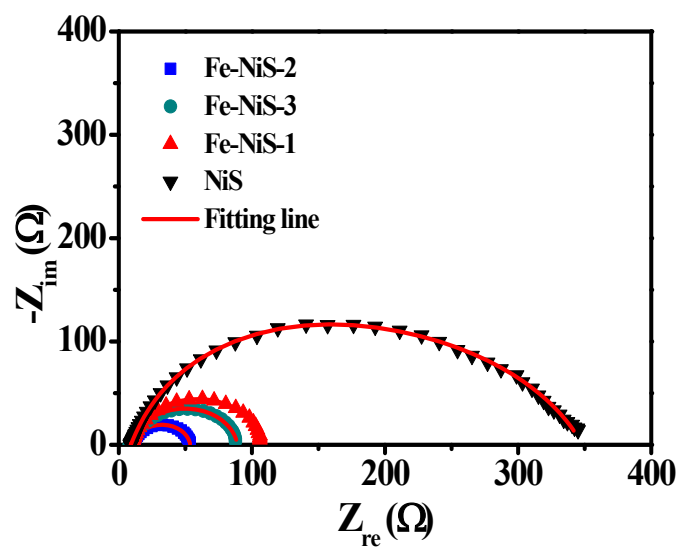

Fig. S5 Nyquist plot of NiS and Fe doped NiS catalysts at the potential of 1.50 V vs. RHE.

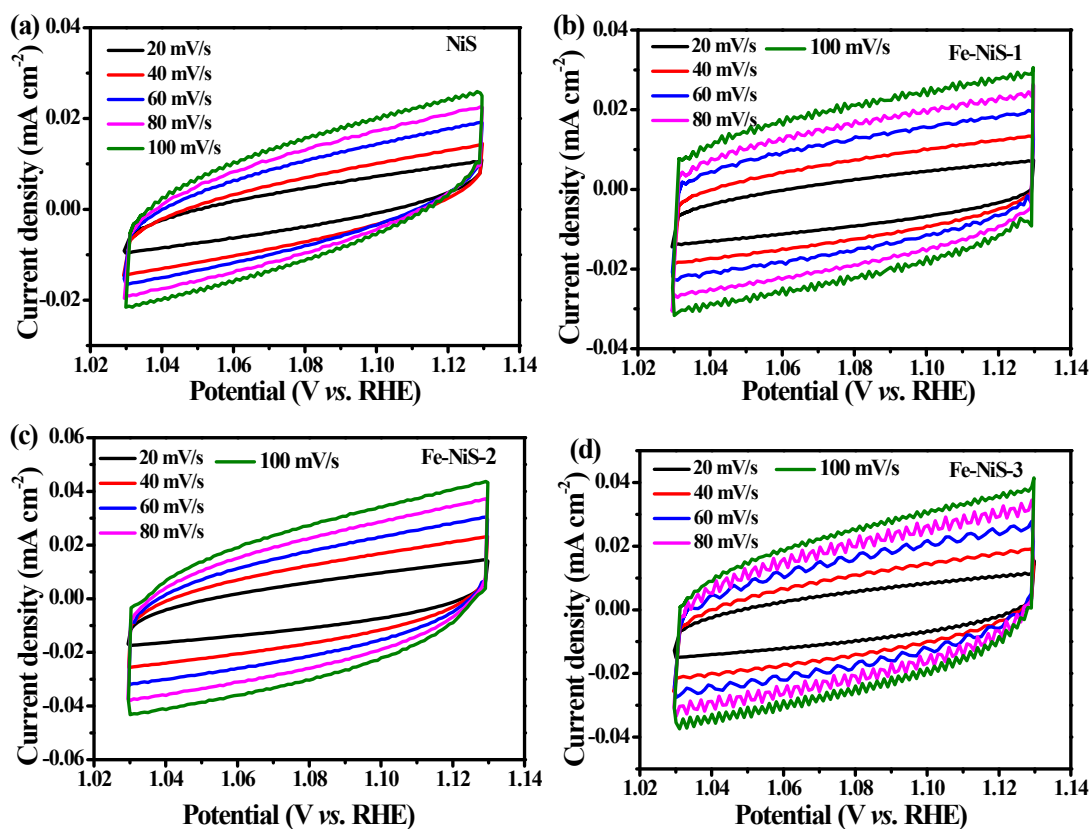

Fig. S6 Cyclic voltammograms of NiS and Fe-doped NiS catalysts in the potential range of 1.03-1.13 V (vs. RHE). The capacitive currents as a function of scan rate ( $\Delta j = (j_a - j_b)/2$ ).

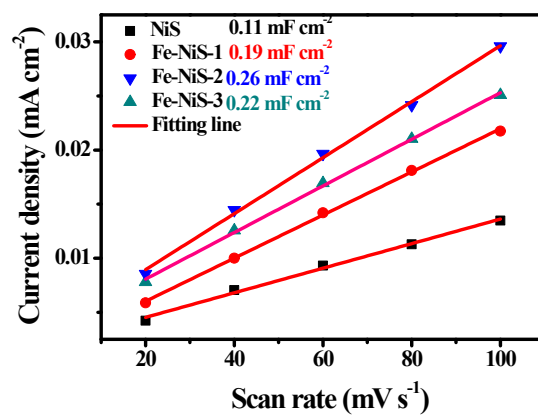

Fig. S7 Linear fitting of current density vs. scan rate at 1.08 V range from 1.03 to 1.13 V vs. RHE for NiS and Fe-doped NiS in 1 M KOH solution.

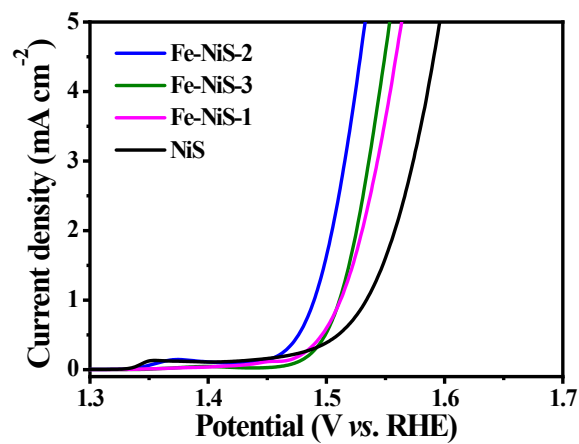

Fig. S8 The specific activity for OER normalized by ECSA.

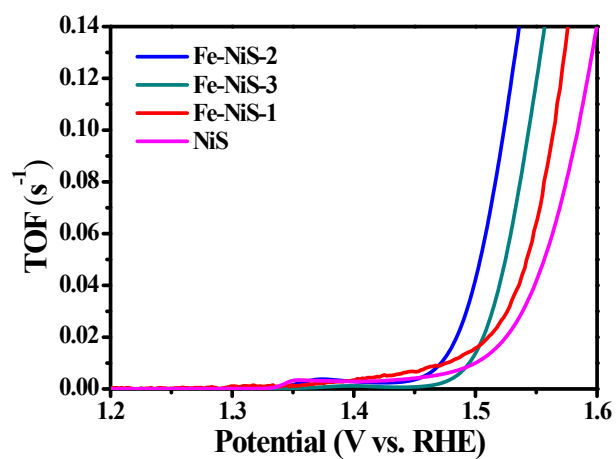

Fig. S9 TOF values of the Fe-NiS-1, Fe-NiS-2, Fe-NiS-3, and NiS as a function of potential.

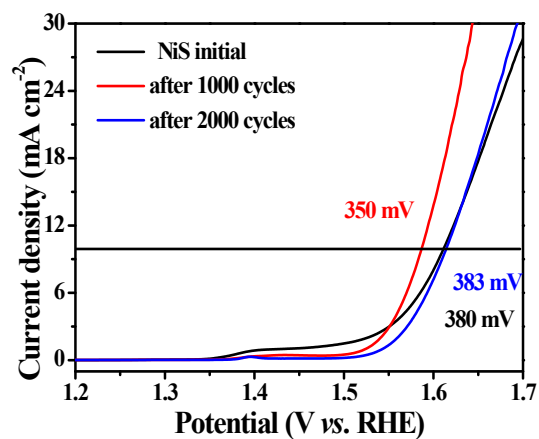

Fig. S10 Polarization curves of freshly configured NiS electrode in Fe containing electrolyte for the initial, after 1000 and after 2000 CV cycles. Condition: Scan rate  $5 \text{ mV s}^{-1}$ , electrolyte 1 M KOH solution.



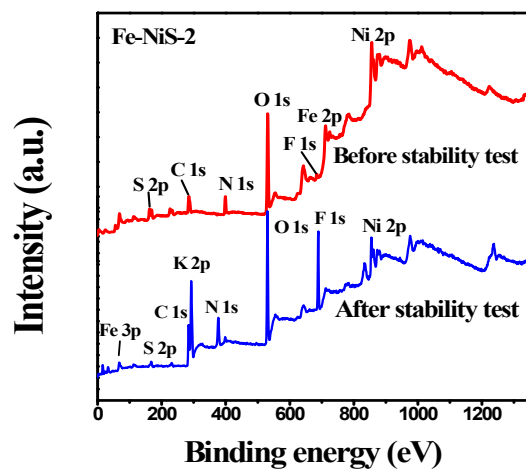

Fig. S11 XPS survey spectra of Fe-NiS-2 before and after the stability test.

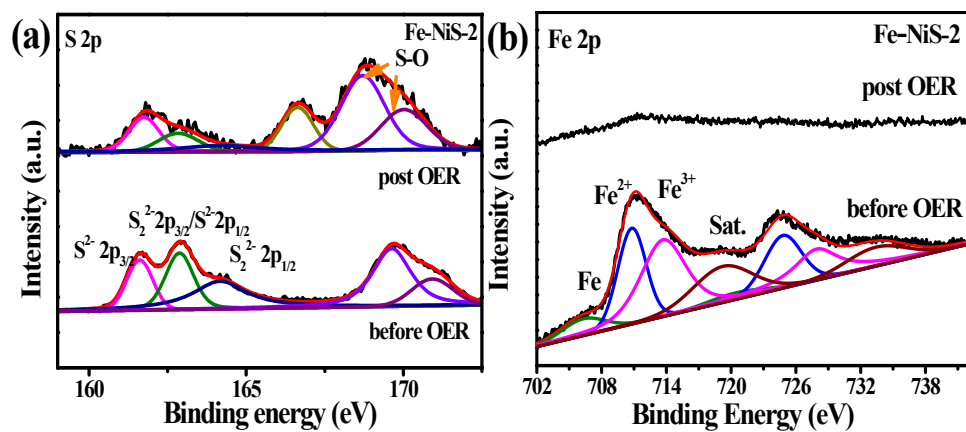

Fig. S12 XPS spectra of Fe-NiS-2 before and post-OER of (a) S 2p and (b) Fe 2p.

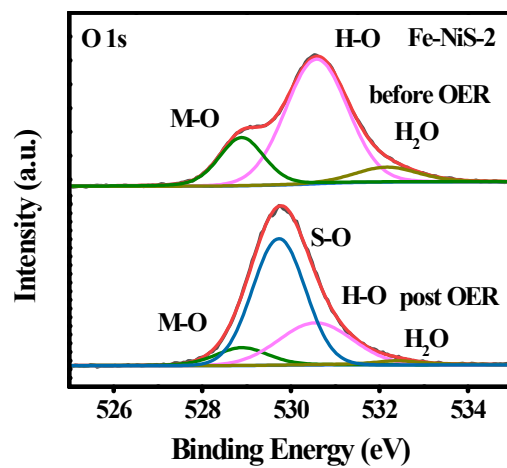

Fig. S13 High-resolution XPS spectrum of O 1s in Fe-NiS-2 before and after OER.

Table S1. Binding energy of the Ni 2p<sub>3/2</sub> and Ni 2p<sub>1/2</sub> components for the Fe-NiS-2 and NiS catalysts.

| Catalysts       | Ni 2p <sub>3/2</sub> |                   | Ni 2p <sub>1/2</sub> |                   | Relative content/% |
|-----------------|----------------------|-------------------|----------------------|-------------------|--------------------|
|                 | Peak                 | Binding energy/eV | Peak                 | Binding energy/eV |                    |
| <b>Fe-NiS-2</b> | Ni(0)                | 852.6             | Ni(0)                | 870.3             | 13.3%              |
|                 | Ni(+2)               | 855.3             | Ni(+2)               | 873.1             | 53.6%              |
|                 | Ni(+3)               | 857.3             | Ni(+3)               | 875.1             | 33.1%              |
| <b>NiS</b>      | Ni(0)                | 852.6             | Ni(0)                | 870.3             | 13.6%              |
|                 | Ni(+2)               | 855.6             | Ni(+2)               | 873.4             | 65.9%              |
|                 | Ni(+3)               | 857.6             | Ni(+3)               | 875.4             | 20.5%              |

Table S2. Binding energy of the S 2p for the Fe-NiS-2 and NiS catalysts.

| Catalysts      | S 2p <sub>3/2</sub>  |                                   | S 2p <sub>1/2</sub>  |                                   |
|----------------|----------------------|-----------------------------------|----------------------|-----------------------------------|
|                | S <sup>2-</sup> (eV) | S <sub>2</sub> <sup>2-</sup> (eV) | S <sup>2-</sup> (eV) | S <sub>2</sub> <sup>2-</sup> (eV) |
| <b>Fe-Ni-2</b> | 161.0                | 162.3                             | 162.3                | 163.4                             |
| <b>NiS</b>     | 161.4                | /                                 | 162.6                | /                                 |

Table S3. Binding energy of the Fe 2p for the Fe-NiS-2 catalyst.

| <b>Catalysts</b> | <b>Fe 2p<sub>3/2</sub></b> |                          | <b>Fe 2p<sub>1/2</sub></b> |                          |
|------------------|----------------------------|--------------------------|----------------------------|--------------------------|
|                  | <b>Peak</b>                | <b>Binding energy/eV</b> | <b>Peak</b>                | <b>Binding energy/eV</b> |
| <b>Fe-NiS-2</b>  | Fe(0)                      | 706.3                    | Fe(0)                      | 720.7                    |
|                  | Fe(+2)                     | 710.8                    | Fe(+2)                     | 725.0                    |
|                  | Fe(+3)                     | 713.7                    | Fe(+3)                     | 727.9                    |
|                  | Sat.                       | 719.5                    | Sat.                       | 733.4                    |

**Table S4.** The comparison of some OER electrocatalysts in alkaline electrolyte.

| Catalysts                                                   | Electrolytes | supporting electrode | Current density         | Overpotential | Ref.      |
|-------------------------------------------------------------|--------------|----------------------|-------------------------|---------------|-----------|
| NiS                                                         | 1M KOH       | GCE                  | 10 mA cm <sup>-2</sup>  | 350 mV        | this work |
| Fe-NiS-2                                                    | 1M KOH       | GCE                  | 10 mA cm <sup>-2</sup>  | 270 mV        | this work |
| Fe-doped NiSe NSs/CNTs                                      | 1M KOH       | CP                   | 10 mA cm <sup>-2</sup>  | 282.7 mV      | 3         |
| Fe-Co <sub>9</sub> S <sub>8</sub> @SNC                      | 1M KOH       | GCE                  | 10 mA cm <sup>-2</sup>  | 273 mV        | 4         |
| 0.1Fe-NiS/MoS <sub>2</sub>                                  | 1M KOH       | GCE                  | 10 mA cm <sup>-2</sup>  | 297 mV        | 5         |
| Fe-NiS/NiS <sub>2</sub>                                     | 1M KOH       | CC                   | 100 mA cm <sup>-2</sup> | 361 mV        | 6         |
| MoC-FeNi@NLC                                                | 1M KOH       | CP                   | 10 mA cm <sup>-2</sup>  | 198 mV        | 7         |
| Ni <sub>2</sub> Fe-LDH/FeNi <sub>2</sub> S <sub>4</sub> /NF | 1M KOH       | NF                   | 100 mA cm <sup>-2</sup> | 240 mV        | 8         |
| FeS/Ni <sub>3</sub> S <sub>2</sub> @NF                      | 1M KOH       | NF                   | 10 mA cm <sup>-2</sup>  | 192 mV        | 9         |
| Ni-MOF-Fe-Se-400                                            | 1M KOH       | GCE                  | 10 mA cm <sup>-2</sup>  | 242 mV        | 10        |
| Fe-CoS <sub>2</sub> /CoS <sub>2</sub> @NC                   | 1M KOH       | CP                   | 10 mA cm <sup>-2</sup>  | 300 mV        | 11        |
| NiFe-PS                                                     | 1M KOH       | NF                   | 10 mA cm <sup>-2</sup>  | 204 mV        | 12        |
| Co <sub>0.89</sub> Fe <sub>11</sub> O-N                     | 1M KOH       | GCE                  | 50 mA cm <sup>-2</sup>  | 360 mV        | 13        |
| Fe-MoO <sub>2</sub> /MoO <sub>3</sub> /ENF                  | 1M KOH       | NF                   | 100 mA cm <sup>-2</sup> | 310 mV        | 14        |
| Fe-CoP cage                                                 | 1M KOH       | GCE                  | 10 mA cm <sup>-2</sup>  | 300 mV        | 15        |
| FeNi <sub>3</sub> @NCNT                                     | 1M KOH       | GCE                  | 10 mA cm <sup>-2</sup>  | 264 mV        | 16        |
| Fe-NiCoP/PBA HNCs                                           | 1M KOH       | GCE                  | 10 mA cm <sup>-2</sup>  | 290 mV        | 17        |
| Ni@3FCCO                                                    | 1M KOH       | NF                   | 10 mA cm <sup>-2</sup>  | 369 mV        | 18        |
| Fe-NiTe-Ni <sub>12</sub> P <sub>5</sub>                     | 1M KOH       | NF                   | 50 mA cm <sup>-2</sup>  | 303 mV        | 19        |
| Fe-CoO/C                                                    | 1M KOH       | GCE                  | 10 mA cm <sup>-2</sup>  | 362 mV        | 20        |
| CoFeP/CoP/CC                                                | 1M KOH       | CC                   | 10 mA cm <sup>-2</sup>  | 240 mV        | 21        |
| FeCoNi-S <sub>2</sub>                                       | 1M KOH       | GCE                  | 10 mA cm <sup>-2</sup>  | 280 mV        | 22        |

Note: GCE as the glassy carbon electrode; CP as the carbon paper; CC as the carbon cloth and NF as the nickel foam.

Table S5. EIS fitting parameters from equivalent circuits of samples during OER process.

| <b>Samples</b>  | <b><math>R_s/\Omega</math></b> | <b><math>R_0/\Omega</math></b> | <b><math>CPE_1/S\ s^{-n}</math></b> | <b><math>R_{ct}/\Omega</math></b> | <b><math>CPE/S\ s^{-n}</math></b> | <b>Chi squared</b> |
|-----------------|--------------------------------|--------------------------------|-------------------------------------|-----------------------------------|-----------------------------------|--------------------|
| <b>NiS</b>      | 8.9                            | 111.1                          | 6.85E-4                             | 228.4                             | 2.63E-4                           | 1.558E-4           |
| <b>Fe-NiS-1</b> | 9.3                            | 11.8                           | 2.94E-4                             | 95.3                              | 1.82E-4                           | 3.470E-4           |
| <b>Fe-NiS-2</b> | 9.5                            | 4.1                            | 2.76E-4                             | 47.8                              | 3.64E-3                           | 4.106E-5           |
| <b>Fe-NiS-3</b> | 8.6                            | 5.2                            | 1.67E-4                             | 76.1                              | 4.87E-5                           | 4.204E-5           |



Table S6. ECSA of NiS and Fe-doped NiS catalysts.

| <b>Catalysts</b> | <b>ECSA (cm<sup>2</sup>)</b> |
|------------------|------------------------------|
| <b>Fe-NiS-1</b>  | 0.33                         |
| <b>Fe-NiS-2</b>  | 0.46                         |
| <b>Fe-NiS-3</b>  | 0.39                         |
| <b>NiS</b>       | 0.19                         |

Table S7. TOF of NiS and Fe-doped NiS catalysts at 1.50 V vs. RHE.

| <b>Catalysts</b> | <b>TOF (s<sup>-1</sup>)</b> |
|------------------|-----------------------------|
| <b>Fe-NiS-1</b>  | 0.016                       |
| <b>Fe-NiS-2</b>  | 0.043                       |
| <b>Fe-NiS-3</b>  | 0.014                       |
| <b>NiS</b>       | 0.010                       |

Table S8. The binding energy of the Ni 2p<sub>3/2</sub> and Ni 2p<sub>1/2</sub> for the Fe-NiS-2 before and post OER.

| Catalysts                      | Ni 2p <sub>3/2</sub> |                   | Ni 2p <sub>1/2</sub> |                   | Relative content/% |
|--------------------------------|----------------------|-------------------|----------------------|-------------------|--------------------|
|                                | Peak                 | Binding energy/eV | Peak                 | Binding energy/eV |                    |
| <b>Fe-NiS-2<br/>before OER</b> | Ni(0)                | 852.6             | Ni(0)                | 870.3             | 13.3%              |
|                                | Ni(+2)               | 855.3             | Ni(+2)               | 873.1             | 53.6%              |
|                                | Ni(+3)               | 857.3             | Ni(+3)               | 875.1             | 33.1%              |
| <b>Fe-NiS-2<br/>post OER</b>   | Ni(0)                | /                 | Ni(0)                | /                 | 0.0%               |
|                                | Ni(+2)               | 855.6             | Ni(+2)               | 873.4             | 52.7%              |
|                                | Ni(+3)               | 857.6             | Ni(+3)               | 875.4             | 47.3%              |

Table S9. The binding energy of the O 1s spectrum for post-OER of Fe-NiS-2.

| Catalysts                    | O 1s             |                   | Relative content/% |
|------------------------------|------------------|-------------------|--------------------|
|                              | Peak             | Binding energy/eV |                    |
| <b>Fe-NiS-2<br/>post OER</b> | S-O              | 830.8             | 59.0%              |
|                              | M-O              | 830.3             | 12.7%              |
|                              | H-O              | 831.5             | 24.7%              |
|                              | H <sub>2</sub> O | 833.5             | 3.6%               |

## REFERENCES

- 1 T. Sheng, J. Y. Ye, W. F. Lin and S. G. Sun, *Phys. Chem. Chem. Phys.*, 2017, **19**, 7476-7480.
- 2 W. Zhong, Y. Liu and D. Zhang, *J. Phys. Chem. C*, 2012, **116**, 2994-3000.
- 3 K. Chang, D. T. Tran, J. Wang, N. H. Kim and J. H. Lee, *J. Mater. Chem. A*, 2022, **10**, 3102-3111.
- 4 W. Wang, Y. Yang, Y. Zhao, S. Wang, X. Ai, J. Fang and Y. Liu, *Nano Res.*, 2022, **15**, 872-880.
- 5 P. Liu, J. Li, J. Yan and W. Song, *Phys. Chem. Chem. Phys.*, 2022, **24**, 8344-8350.
- 6 X. Zhao, X. Wang, L. Chen, X. Kong, Z. Li, Y. Zhao, Z. Wu, T. Wang, Z. Liu and P. Yang, *J. Electroanal. Chem.*, 2022, **920**, 116630.
- 7 J. Liu, J. Zhang, H. Zhou, B. Liu, H. Dong, X. Lin and Y. Qin, *J. Colloid Interface Sci.*, 2023, **629**, 822-831.
- 8 L. Tan, J. Yu, C. Wang, H. Wang, X. Liu, H. Gao, L. Xin, D. Liu, W. Hou and T. Zhan, *Adv. Funct. Mater.*, 2022, **32**, 2200951.
- 9 H. Li, S. Yang, W. Wei, M. Zhang, Z. Jiang, Z. Yan and J. Xie, *J. Colloid Interface Sci.*, 2022, **608**, 536-548.
- 10 K. Srinivas, F. Ma, Y. Liu, Z. Zhang, Y. Wu and Y. Chen, *ACS Appl. Mater. Interfaces*, 2022, **14**, 52927-52939.
- 11 C. Yang, Y.-X. Chang, H. Kang, Y. Li, M. Yan and S. Xu, *Appl. Phys. A*, 2021, **127**, 465.
- 12 J. Zhang, H. Yu, J. Yang, X. Zhu, M. Hu and J. Yang, *J. Alloys Compd.*, 2022, **924**, 166613.
- 13 Q. Du, P. Su, Z. Cao, J. Yang, C. A. H. Price and J. Liu, *SM&T*, 2021, **29**, e00293.
- 14 J. Chen, Q. Zeng, X. Qi, B. Peng, L. Xu, C. Liu and T. Liang, *Int. J. Hydrog. Energy*, 2020, **45**, 24828-24839.
- 15 J. Y. Xie, Z. Z. Liu, J. Li, L. Feng, M. Yang, Y. Ma, D. P. Liu, L. Wang, Y. M. Chai and B. Dong, *J. Energy Chem.*, 2020, **48**, 328-333.
- 16 D. Chen, Q. Sun, C. Han, Y. Guo, Q. Huang, W. A. Goddard and J. Qian, *J. Mater. Chem. A*, 2022, **10**, 16007-16015.
- 17 D. Li, C. Liu, W. Ma, S. Xu, Y. Lu, W. Wei, J. Zhu and D. Jiang, *Electrochim. Acta*, 2021, **367**, 137492.
- 18 M. Yang, H. Tan, S. Ma, Y. Mi, L. Liu, Z. Zhao, H. Li and D. Xiong, *Nanoscale*, 2023, DOI: 10.1039/D3NR02131A.
- 19 Y.-J. Tang, Y. Zou and D. Zhu, *J. Mater. Chem. A*, 2022, **10**, 12438-12446.
- 20 W. Li, M. Li, C. Wang, Y. Wei and X. Lu, *Appl. Surf. Sci.*, 2020, **506**, 144680.
- 21 D. Jiang, S. Xu, B. Quan, C. Liu, Y. Lu, J. Zhu, D. Tian and D. Li, *J. Colloid Interface Sci.*, 2021, **591**, 67-75.
- 22 R. He, C. Wang and L. Feng, *Chin. Chem. Lett.*, 2023, **34**, 107241.
